# Supplementary material for: The prognostic value of KRAS mutation by cell-free DNA in cancer patients: A systematic review and meta-analysis
Source: PubMed Central journal article supplement (PMC5552123; doi:10.1371/journal.pone.0182562), 2017-08-10
Supplement: pone.0182562.s002.pdf [file pone.0182562.s002.pdf]

S2 Table. Application of the quality assessment tool NOS to the studies included in the meta-analysis

| Items                                                                       | Subgroups                                                                                                                                                         | Details                                                                    | No 1        | No 2        | No 3         | No 4       | No 5            | No 6       | No 7               | No 8           | No 9         | No 10     | No 11      | No 12          | No 13     | No 14        | No 15         | No 16        | No 17         | No 18         | No 19         | No 20         | No 21        | No 22       | No 23          | No 24          | No 25          | No 26       | No 27           | No 28      | No 29    | No 30        |   |   |   |  |
|-----------------------------------------------------------------------------|-------------------------------------------------------------------------------------------------------------------------------------------------------------------|----------------------------------------------------------------------------|-------------|-------------|--------------|------------|-----------------|------------|--------------------|----------------|--------------|-----------|------------|----------------|-----------|--------------|---------------|--------------|---------------|---------------|---------------|---------------|--------------|-------------|----------------|----------------|----------------|-------------|-----------------|------------|----------|--------------|---|---|---|--|
|                                                                             |                                                                                                                                                                   |                                                                            | Camps, 2005 | Camps, 2011 | Castib, 1998 | Chen, 2010 | Dobryzcka, 2011 | Eiel, 2015 | El Messaoudi, 2016 | Gautschi, 2007 | Haidao, 2016 | Han, 2016 | Hara, 2017 | Jamrozka, 2017 | Kim, 2015 | Kimura, 2004 | Kingham, 2016 | Kimjoo, 2015 | Laethem, 2017 | Nygaard, 2014 | Nygaard, 2014 | Ramirez, 2001 | Sommad, 2015 | Stagh, 2015 | Spindler, 2014 | Spindler, 2015 | Taberner, 2015 | Takai, 2015 | Tjonnvoll, 2016 | Wang, 2010 | Xu, 2014 | Yamada, 1998 |   |   |   |  |
| Selection                                                                   | 1) Representativeness of the exposed cohort                                                                                                                       | a) truly representative of the average _____ (describe) in the community * | +           | +           | +            | +          | +               | +          | +                  | +              | +            | +         | +          | +              | +         | +            | +             | +            | +             | +             | +             | +             | +            | +           | +              | +              | +              | +           | +               | +          | +        | +            | + | + |   |  |
|                                                                             |                                                                                                                                                                   | b) random representativeness of the average _____ in the community *       |             |             |              |            |                 |            |                    |                |              |           |            |                |           |              |               |              |               |               |               |               |              |             |                |                |                |             |                 |            |          |              |   |   |   |  |
|                                                                             | 2) Selection of the non exposed cohort                                                                                                                            | a) no description of the derivation of the cohort                          |             |             |              |            |                 |            |                    |                |              |           |            |                |           |              |               |              |               |               |               |               |              |             |                |                |                |             |                 |            |          |              |   |   |   |  |
|                                                                             |                                                                                                                                                                   | b) drawn from a different source                                           |             |             |              |            |                 |            |                    |                |              |           |            |                |           |              |               |              |               |               |               |               |              |             |                |                |                |             |                 |            |          |              |   |   |   |  |
| 3) Ascertainment of exposure                                                | a) no description of the derivation of the non exposed cohort                                                                                                     |                                                                            |             |             |              |            |                 |            |                    |                |              |           |            |                |           |              |               |              |               |               |               |               |              |             |                |                |                |             |                 |            |          |              |   |   |   |  |
|                                                                             | a) secure record (eg surgical records) *                                                                                                                          | +                                                                          | +           | +           | +            | +          | +               | +          | +                  | +              | +            | +         | +          | +              | +         | +            | +             | +            | +             | +             | +             | +             | +            | +           | +              | +              | +              | +           | +               | +          | +        | +            | + | + | + |  |
|                                                                             | b) structured interview *                                                                                                                                         |                                                                            |             |             |              |            |                 |            |                    |                |              |           |            |                |           |              |               |              |               |               |               |               |              |             |                |                |                |             |                 |            |          |              |   |   |   |  |
|                                                                             | c) written self report                                                                                                                                            |                                                                            |             |             |              |            |                 |            |                    |                |              |           |            |                |           |              |               |              |               |               |               |               |              |             |                |                |                |             |                 |            |          |              |   |   |   |  |
| 4) Demonstration that outcome of interest was not present at start of study | a) no description                                                                                                                                                 |                                                                            |             |             |              |            |                 |            |                    |                |              |           |            |                |           |              |               |              |               |               |               |               |              |             |                |                |                |             |                 |            |          |              |   |   |   |  |
|                                                                             | a) yes *                                                                                                                                                          | +                                                                          | +           | +           | +            | +          | +               | +          | +                  | +              | +            | +         | +          | +              | +         | +            | +             | +            | +             | +             | +             | +             | +            | +           | +              | +              | +              | +           | +               | +          | +        | +            | + | + | + |  |
| Comparability                                                               | 1) Comparability of cohorts on the basis of the design or analysis                                                                                                | a) no                                                                      |             |             |              |            |                 |            |                    |                |              |           |            |                |           |              |               |              |               |               |               |               |              |             |                |                |                |             |                 |            |          |              |   |   |   |  |
|                                                                             |                                                                                                                                                                   | b) study controls for _____ (select the most important factor) *           | +           | +           | +            | +          | +               | +          | +                  | +              | +            | +         | +          | +              | +         | +            | +             | +            | +             | +             | +             | +             | +            | +           | +              | +              | +              | +           | +               | +          | +        | +            | + | + | + |  |
| Outcome                                                                     | 1) Assessment of outcome                                                                                                                                          | a) independent blind assessment *                                          |             |             |              |            |                 |            |                    |                |              |           |            |                |           |              |               |              |               |               |               |               |              |             |                |                |                |             |                 |            |          |              |   |   |   |  |
|                                                                             |                                                                                                                                                                   | b) record linkage *                                                        | +           | +           | +            | +          | +               | +          | +                  | +              | +            | +         | +          | +              | +         | +            | +             | +            | +             | +             | +             | +             | +            | +           | +              | +              | +              | +           | +               | +          | +        | +            | + | + | + |  |
|                                                                             | 2) Was follow-up long enough for outcomes to occur                                                                                                                | a) self report                                                             |             |             |              |            |                 |            |                    |                |              |           |            |                |           |              |               |              |               |               |               |               |              |             |                |                |                |             |                 |            |          |              |   |   |   |  |
|                                                                             |                                                                                                                                                                   | a) yes (select an adequate follow up period for outcome of interest) *     |             |             |              |            |                 |            |                    |                |              |           |            |                |           |              |               |              |               |               |               |               |              |             |                |                |                |             |                 |            |          |              |   |   |   |  |
| 3) Adequacy of follow up of cohorts                                         | a) no                                                                                                                                                             |                                                                            |             |             |              |            |                 |            |                    |                |              |           |            |                |           |              |               |              |               |               |               |               |              |             |                |                |                |             |                 |            |          |              |   |   |   |  |
|                                                                             | b) complete follow up - all subjects accounted for *                                                                                                              |                                                                            |             |             |              |            |                 |            |                    |                |              |           |            |                |           |              |               |              |               |               |               |               |              |             |                |                |                |             |                 |            |          |              |   |   |   |  |
|                                                                             | c) subjects lost to follow up unlikely to introduce bias - small number lost -> _____ % (select an adequate %) follow up, or description provided of those lost * |                                                                            |             |             |              |            |                 |            |                    |                |              |           |            |                |           |              |               |              |               |               |               |               |              |             |                |                |                |             |                 |            |          |              |   |   |   |  |
|                                                                             | c) follow up rate < _____ % (select an adequate %) and no description of those lost                                                                               |                                                                            |             |             |              |            |                 |            |                    |                |              |           |            |                |           |              |               |              |               |               |               |               |              |             |                |                |                |             |                 |            |          |              |   |   |   |  |
| Assessment                                                                  | Total                                                                                                                                                             | a) no statement                                                            |             |             |              |            |                 |            |                    |                |              |           |            |                |           |              |               |              |               |               |               |               |              |             |                |                |                |             |                 |            |          |              |   |   |   |  |
|                                                                             |                                                                                                                                                                   | * Selection (max of 4 stars)                                               | 4           | 4           | 4            | 4          | 4               | 4          | 4                  | 4              | 4            | 4         | 4          | 4              | 4         | 4            | 4             | 4            | 4             | 4             | 4             | 4             | 4            | 4           | 4              | 4              | 4              | 4           | 4               | 4          | 4        | 4            | 4 | 4 |   |  |
|                                                                             |                                                                                                                                                                   | ** Comparability (max of 3 stars)                                          | 1           | 1           | 1            | 1          | 1               | 1          | 1                  | 1              | 1            | 1         | 1          | 1              | 1         | 1            | 1             | 1            | 1             | 1             | 1             | 1             | 1            | 1           | 1              | 1              | 1              | 1           | 1               | 1          | 1        | 1            | 1 | 1 | 1 |  |
|                                                                             |                                                                                                                                                                   | * Outcome (max of 3 stars)                                                 | 1           | 2           | 3            | 3          | 2               | 2          | 3                  | 3              | 3            | 3         | 3          | 2              | 2         | 2            | 2             | 3            | 2             | 2             | 3             | 1             | 3            | 2           | 2              | 2              | 3              | 1           | 2               | 2          | 2        | 3            | 3 | 3 | 1 |  |

Note: A study can be awarded a maximum of one star for each numbered item within the Selection and Outcome categories. A maximum of two stars can be given for Comparability
